# Supplementary material for: coreSCD: multi-stakeholder consensus on core outcomes for sickle cell disease clinical trials
Source: Springer Nature journal article supplement (doi:10.1186/s12874-021-01413-8), 2021-10-19
Supplement: MOESM1 [file 19772538]

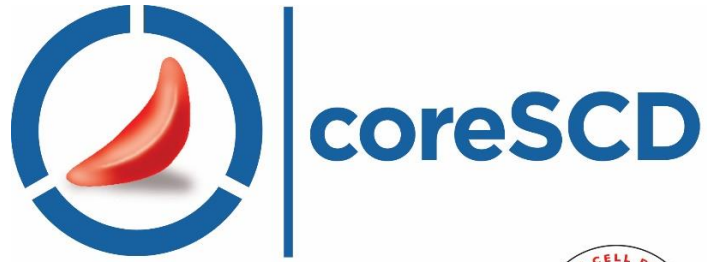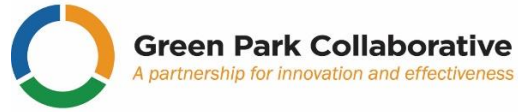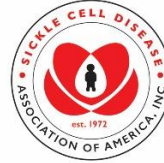

## DISCUSSION SUMMARY

# Part 1: Outcomes for Trials of Disease Modifying Therapies

October 9<sup>th</sup> In-Person Meeting

## General Considerations

- In addition to developing separate core sets for trials of disease-modifying and acute interventions, we need to determine which outcomes are appropriate for **Phase 3 vs. Phase 4** trials (Phase 3 trials are shorter in duration and include fewer participants than Phase 4 trials)
- It is critical that the core sets be very small (e.g. fewer than 10 outcomes for Phase 4 and around 3 outcomes for Phase 3), but this does not limit the total number of outcomes that can be measured for any specific trial
- Outcomes that are not eliminated through the Delphi process can be assigned to one of **three categories**:
  - Outcomes that should be included in **all Phase 3 and Phase 4 trials** of disease-modifying therapies or acute interventions
  - Outcomes that should be included in **all Phase 4 trials**, but might not be appropriate or feasible for Phase 3 trials
  - Outcomes that are **critical for certain types of research**, but do not belong in a core set

## Pain Outcomes

| <i>Round 2 Delphi Results</i>    | <b>Overall<br/>(N=44)</b> | <b>Patients/<br/>Advocates<br/>(N=10)</b> | <b>Clinicians/<br/>Researchers<br/>(N=10)</b> | <b>HTA/<br/>Payers<br/>(N=9)</b> | <b>Govt.<br/>Agencies<br/>(N=4)</b> | <b>Industry<br/>(N=11)</b> |
|----------------------------------|---------------------------|-------------------------------------------|-----------------------------------------------|----------------------------------|-------------------------------------|----------------------------|
| <b>Pain frequency</b>            | <b>89%</b>                | 90%                                       | 90%                                           | 89%                              | 75%                                 | 91%                        |
| <b>Pain intensity</b>            | <b>84%</b>                | 90%                                       | 80%                                           | 89%                              | 75%                                 | 82%                        |
| <b>Vaso-occlusive crisis</b>     | <b>82%</b>                | 90%                                       | 70%                                           | 78%                              | 75%                                 | 91%                        |
| <b>Pain duration</b>             | <b>80%</b>                | 80%                                       | 90%                                           | 78%                              | 50%                                 | 82%                        |
| <b>Pain interference /impact</b> | <b>79%</b>                | 80%                                       | 80%                                           | 88%                              | 50%                                 | 82%                        |
| <b>Chronic pain*</b>             | <b>70%</b>                | 70%                                       | 60%                                           | 78%                              | 75%                                 | 73%                        |

- **Pain interference/impact**
  - General agreement that belongs in the functioning domain as an aspect of physical functioning
- **“Pain due to VOC”** (renamed because VOC is the cause and pain is the effect)
  - Suggested as primary pain outcome for the COS
  - Definition includes measurement of pain frequency, duration, and intensity
  - Discussed how VOC is determined - directly by patient or with input from clinician; in either case, requires education about the distinction between crisis pain and chronic pain
- **Chronic pain**
  - Might belong with pain interference
  - Can result from new disease process rather than sickling
  - Becomes more important with evolution of therapies (Phase 4, not Phase 3)

## Neurocognitive Outcomes

| <i>Round 2 Delphi Results</i>          | Overall<br>(N=44) | Patients/<br>Advocates<br>(N=10) | Clinicians/<br>Researchers<br>(N=10) | HTA/<br>Payers<br>(N=9) | Govt.<br>Agencies<br>(N=4) | Industry<br>(N=11) |
|----------------------------------------|-------------------|----------------------------------|--------------------------------------|-------------------------|----------------------------|--------------------|
| <b>Stroke/cerebrovascular accident</b> | <b>95%</b>        | 90%                              | 100%                                 | 100%                    | 75%                        | 100%               |
| <b>Silent cerebral infarcts</b>        | <b>88%</b>        | 78%                              | 90%                                  | 75%                     | 100%                       | 100%               |
| <b>Transient ischemic attack</b>       | <b>79%</b>        | 62%                              | 90%                                  | 78%                     | 75%                        | 82%                |

- Outcomes in this category more appropriately labeled as *neurocognitive complications* that can have an impact on *neurocognitive function*
- Deficits in neurocognitive function seen in children without known complications; but formal neurocognitive testing takes time and an easier screening test has not been found
- For Phase 3 and Phase 4 trials, neurocognitive function would not be considered as an endpoint; but for children, impact of drug to normalize TCD is very important
- Stroke is very important from a resource utilization standpoint
- Big category is important, but which you look at depends on type of study

## Fatigue

| <i>Round 2 Delphi Results</i> | Overall<br>(N=44) | Patients/<br>Advocates<br>(N=10) | Clinicians/<br>Researchers<br>(N=10) | HTA/<br>Payers<br>(N=9) | Govt.<br>Agencies<br>(N=4) | Industry<br>(N=11) |
|-------------------------------|-------------------|----------------------------------|--------------------------------------|-------------------------|----------------------------|--------------------|
| <b>Fatigue</b>                | <b>84%</b>        | 90%                              | 78%                                  | 67%                     | 75%                        | 100%               |

- Fatigue is clinically meaningful and of very high importance to patients; number one concern for many patients because they don't deal with pain as often
- Multifactorial symptom that includes physical and mental fatigue and tiredness; can be tied to acute and chronic pain, cognitive functioning, economic functioning, sleep, depression, etc.
- Very hard to study impact on fatigue in a single, short-term trial, so might not work as a core outcome
- May fit better under functioning and already included in some functioning scales
- For payers, not meaningful unless in a functioning context- they're interested in putting people back to school and work and not ready to pay for fatigue itself
- May be more appropriate as an exploratory, rather than primary or key secondary, endpoint; can be used to inform patients even if not on the label, which is important because fatigue is linked to compliance (e.g. hydroxyurea vs. l-glutamine)
- Need to define and figure out best way to measure
- Have to consider tradeoff with other potential treatment effects

## Other Physiological/Clinical Outcomes

| <i>Round 2 Delphi Results</i>  | <b>Overall<br/>(N=44)</b> | <b>Patients/<br/>Advocates<br/>(N=10)</b> | <b>Clinicians/<br/>Researchers<br/>(N=10)</b> | <b>HTA/<br/>Payers<br/>(N=9)</b> | <b>Govt.<br/>Agencies<br/>(N=4)</b> | <b>Industry<br/>(N=11)</b> |
|--------------------------------|---------------------------|-------------------------------------------|-----------------------------------------------|----------------------------------|-------------------------------------|----------------------------|
| <b>Sickle cell nephropathy</b> | <b>74%</b>                | 67%                                       | 60%                                           | 100%                             | 50%                                 | 82%                        |
| <b>Acute kidney injury</b>     | 62%                       | <b>75%</b>                                | 40%                                           | 62%                              | 75%                                 | 70%                        |
| <b>Acute chest syndrome</b>    | <b>84%</b>                | 80%                                       | 100%                                          | 78%                              | 50%                                 | 91%                        |
| <b>Pulmonary hypertension</b>  | <b>70%</b>                | 60%                                       | 80%                                           | 67%                              | 50%                                 | 82%                        |
| <b>Pregnancy complications</b> | 66%                       | <b>78%</b>                                | 70%                                           | 75%                              | 50%                                 | 50%                        |

- **Acute kidney injury**
  - This is a complication of treatment and a safety measure, therefore should not be included in core set (safety measures related to new treatments will be a regulatory requirement and therefore no need to reach agreement through multi-stakeholder consensus process)
- **Pregnancy complications**
  - Very important issue that needs further study, but not appropriate as a clinical trial outcome at this point because we don't know enough about it
- **Acute chest syndrome, sickle cell nephropathy, and pulmonary hypertension**
  - All associated with high mortality so important to address
  - ACS is good for Phase 3 and 4 trials, but nephropathy and pulmonary hypertension more appropriate for Phase 4
  - Proposal to use "end organ damage" as a category that encompasses these three

## Biomarkers

| <i>Round 2 Delphi Results</i>     | <b>Overall<br/>(N=44)</b> | <b>Patients/<br/>Advocates<br/>(N=10)</b> | <b>Clinicians/<br/>Researchers<br/>(N=10)</b> | <b>HTA/<br/>Payers<br/>(N=9)</b> | <b>Govt.<br/>Agencies<br/>(N=4)</b> | <b>Industry<br/>(N=11)</b> |
|-----------------------------------|---------------------------|-------------------------------------------|-----------------------------------------------|----------------------------------|-------------------------------------|----------------------------|
| <b>Level of hemoglobin</b>        | <b>92%</b>                | 100%                                      | 100%                                          | 86%                              | 100%                                | 82%                        |
| <b>Level of fetal hemoglobin</b>  | 69%                       | <b>86%</b>                                | 80%                                           | 60%                              | 67%                                 | 55%                        |
| <b>Level of sickle hemoglobin</b> | 63%                       | <b>88%</b>                                | 70%                                           | 67%                              | 67%                                 | 36%                        |
| <b>Hemolysis</b>                  | <b>73%</b>                | 86%                                       | 67%                                           | 57%                              | 67%                                 | 82%                        |
| <b>Change in hematocrit</b>       | <b>71%</b>                | 40%                                       | 78%                                           | 86%                              | 100%                                | 60%                        |
| <b>Oxygen % saturation</b>        | 55%                       | <b>100%</b>                               | 44%                                           | 20%                              | 50%                                 | 50%                        |

- Suggestion that these biomarkers should not be part of a core set because they are treatment-specific
- From HTA perspective, biomarkers not sufficient without strong correlation to clinical endpoints
- Patients concerned about overreliance (by payers) on hemoglobin as an indicator of disease severity
- Noted that hemoglobin is ubiquitously reported in the "real world"

| <i>Round 2 Delphi Results</i>              | Overall<br>(N=44) | Patients/<br>Advocates<br>(N=10) | Clinicians/<br>Researchers<br>(N=10) | HTA/<br>Payers<br>(N=9) | Govt.<br>Agencies<br>(N=4) | Industry<br>(N=11) |
|--------------------------------------------|-------------------|----------------------------------|--------------------------------------|-------------------------|----------------------------|--------------------|
| <b>Cardiac Function</b>                    | <b>89%</b>        | 100%                             | 78%                                  | 100%                    | 100%                       | 100%               |
| <b>Kidney Function</b>                     | <b>86%</b>        | 100%                             | 89%                                  | 86%                     | 67%                        | 80%                |
| <b>Transcranial Doppler<br/>Velocities</b> | <b>86%</b>        | 86%                              | 90%                                  | 50%                     | 100%                       | 100%               |
| <b>Lung Function</b>                       | <b>72%</b>        | 100%                             | 78%                                  | 57%                     | 67%                        | 60%                |
| <b>Liver Function</b>                      | 54%               | <b>83%</b>                       | 67%                                  | 43%                     | 67%                        | 30%                |
| <b>Splenic Function</b>                    | 42%               | <b>86%</b>                       | 30%                                  | 50%                     | 67%                        | 10%                |

## Functioning Outcomes

| <i>Round 2 Delphi Results</i>                      | Overall<br>(N=44) | Patients/<br>Advocates<br>(N=10) | Clinicians/<br>Researchers<br>(N=10) | HTA/<br>Payers<br>(N=9) | Govt.<br>Agencies<br>(N=4) | Industry<br>(N=11) |
|----------------------------------------------------|-------------------|----------------------------------|--------------------------------------|-------------------------|----------------------------|--------------------|
| <b>Cognitive function</b>                          | <b>93%</b>        | 90%                              | 100%                                 | 89%                     | 75%                        | 100%               |
| <b>Physical function</b>                           | <b>84%</b>        | 70%                              | 90%                                  | 78%                     | 75%                        | 100%               |
| <b>Health-related (global)<br/>quality of life</b> | <b>89%</b>        | 80%                              | 90%                                  | 89%                     | 100%                       | 91%                |
| <b>Depression</b>                                  | <b>66%</b>        | 80%                              | 60%                                  | 67%                     | 25%                        | 73%                |
| <b>Anxiety</b>                                     | 50%               | <b>80%</b>                       | 30%                                  | 44%                     | 25%                        | 55%                |
| <b>Future orientation*</b>                         | 53%               | <b>89%</b>                       | 25%                                  | 33%                     | 50%                        | 57%                |
| <b>Missed days at<br/>school/work</b>              | 77%               | <b>60%</b>                       | 80%                                  | 78%                     | 50%                        | 100%               |
| <b>Patient satisfaction<br/>w/treatment</b>        | 70%               | <b>70%</b>                       | 60%                                  | 56%                     | 75%                        | 91%                |

- Missed days of school/work important as both an economic outcome and an aspect of social functioning
- Depression and anxiety difficult – are they being looked at as a direct result of treatment? They're relevant, but don't stand out as much in SCD population as physical and cognitive functioning
- There are conflicting priorities with regard to generic vs. disease-specific HRQOL instruments – generic important from health economics point of view (and in some countries is required) so can compare SCD to other diseases, but trial sponsors want a measure that is as specific and sensitive as possible
- In the US, HRQOL is considered a research tool
- Point made that having everyone use the same measure is more important than having a measure that includes everything; ASCQ-Me may be suitable for this purpose, but no sure it measures everything adequately
- Also need to keep in mind that the more you add the less sensitive the tool becomes, and the more burden on patients to complete
- Economic burden suggested as additional HRQOL outcome

## Resource Use

| <i>Round 2 Delphi Results</i>     | Overall<br>(N=44) | Patients/<br>Advocates<br>(N=10) | Clinicians/<br>Researchers<br>(N=10) | HTA/<br>Payers<br>(N=9) | Govt.<br>Agencies<br>(N=4) | Industry<br>(N=11) |
|-----------------------------------|-------------------|----------------------------------|--------------------------------------|-------------------------|----------------------------|--------------------|
| <b>Emergency dept visit</b>       | <b>84%</b>        | 80%                              | 80%                                  | 78%                     | 100%                       | 91%                |
| <b>Acute care visit</b>           | <b>77%</b>        | 70%                              | 80%                                  | 67%                     | 100%                       | 82%                |
| <b>Freq of hospitalization</b>    | <b>84%</b>        | 80%                              | 80%                                  | 89%                     | 75%                        | 91%                |
| <b>Freq of ICU admission</b>      | <b>70%</b>        | 70%                              | 70%                                  | 78%                     | 50%                        | 73%                |
| <b>Length of hospital stay</b>    | <b>73%</b>        | 80%                              | 60%                                  | 78%                     | 50%                        | 82%                |
| <b>Hospital readmission</b>       | <b>82%</b>        | 80%                              | 80%                                  | 89%                     | 50%                        | 91%                |
| <b>Need for blood transfusion</b> | <b>75%</b>        | 60%                              | 80%                                  | 78%                     | 50%                        | 91%                |

- **Emergency department visits and frequency of hospitalization**
  - Consistently ranked as most important
  - Highest cost to system and greatest burden to patients
- **Acute care visit**
  - Much lower burden for patients, but not an option for everyone
  - May need to be combined with ED visit
- **Need for blood transfusion**
  - Also considered important by many in the room
  - Argument against including: it's the reason for the blood transfusion that's important and this should be captured elsewhere
  - Counterargument: it's still important as a cost to system and burden to patients
- **Length of hospital stay and ICU admissions**
  - Dependent on health system rules, decision-making by specific doctor, etc., so not as useful for measuring impact of treatment
- **Hospital readmission**
  - May not be a good outcome to determine the impact of an intervention – unpredictable and multifactorial
  - More a marker of hospital quality than effectiveness of intervention
  - Argument for including based on paper describing readmission rates for SCD patients; readmission within 2 weeks considered a continuation of previous admission; most common reasons for readmission were poor treatment and premature discharge
- **Indirect costs**
  - Include missed days of school or work for patients and their caregivers
  - Some countries take these into account in health technology assessment

## Mortality and Survival

| <i>Round 2 Delphi Results</i>            | <b>Overall<br/>(N=44)</b> | <b>Patients/<br/>Advocates<br/>(N=10)</b> | <b>Clinicians/<br/>Researchers<br/>(N=10)</b> | <b>HTA/<br/>Payers<br/>(N=9)</b> | <b>Govt.<br/>Agencies<br/>(N=4)</b> | <b>Industry<br/>(N=11)</b> |
|------------------------------------------|---------------------------|-------------------------------------------|-----------------------------------------------|----------------------------------|-------------------------------------|----------------------------|
| <b>Cause-specific survival/mortality</b> | <b>84%</b>                | 90%                                       | 100%                                          | 89%                              | 75%                                 | 64%                        |
| <b>Event-free survival</b>               | <b>79%</b>                | 70%                                       | 100%                                          | 89%                              | 75%                                 | 60%                        |
| <b>All-cause survival/mortality</b>      | <b>75%</b>                | 90%                                       | 100%                                          | 67%                              | 50%                                 | 55%                        |

- **Event-free survival**
  - Useful for assessing quality of life years gained for a particular intervention
- **Cause-specific mortality**
  - Of greatest interest
  - Includes any cause directly related to SCD
  - Most frequent (in order) include acute chest syndrome, VOC, infection, and chronic renal failure
- **All-cause mortality**
  - Can be useful to look at in addition to cause-specific because might identify other causes that are higher in SCD than in the general population
- Suggested that these outcomes not be part of the core set

## Part 2: Outcomes for Trials of Acute Interventions

November 6<sup>th</sup> Web Conference

### Definition

- Trials of acute interventions:
  - Involve treatments for acute complications such as vaso-occlusive crisis that require rapid intervention
  - Goal is to alleviate symptoms and lessen the risk of life-threatening complications
  - Typically shorter in duration than trials for disease-modifying therapies (days/weeks rather than months/years)
  - Often conducted in acute care setting such as a hospital

### Pain Outcomes

|                           | Overall<br>(N=44) | Patients/<br>Advocates<br>(N=10) | Clinicians/<br>Researchers<br>(N=10) | HTA/<br>Payers<br>(N=9) | Govt.<br>Agencies<br>(N=4) | Industry<br>(N=11) |
|---------------------------|-------------------|----------------------------------|--------------------------------------|-------------------------|----------------------------|--------------------|
| Vaso-occlusive crisis     | 91%               | 80%                              | 90%                                  | 100%                    | 100%                       | 91%                |
| Pain intensity            | 89%               | 90%                              | 70%                                  | 89%                     | 100%                       | 100%               |
| Pain duration             | 80%               | 80%                              | 60%                                  | 78%                     | 75%                        | 100%               |
| Pain frequency            | 80%               | 70%                              | 70%                                  | 89%                     | 75%                        | 91%                |
| Pain interference /impact | 79%               | 78%                              | 70%                                  | 75%                     | 75%                        | 91%                |
| Opioid use                | 66%               | 70%                              | 60%                                  | 44%                     | 75%                        | 82%                |

- **“Pain due to VOC”** was suggested as primary pain outcome for the COS at in-person meeting, but it was recommended that this be changed to **“acute pain episode”**
  - Until there are biomarkers or some other means of identifying VOC, and in the absence of an agreed-upon definition of VOC, outcome should be independent of mechanism
- **Pain frequency, intensity, and duration** are all included in definition of **acute pain episode** but should be kept as 3 distinct outcomes
  - Intensity and duration are difficult to measure, particularly outside of acute setting
  - Pain frequency more important for trials of disease-modifying therapies, but intensity and duration important for trials of acute interventions
  - Composite endpoints are problematic from clinical trial viewpoint, so if in doubt should avoid “lumping”
- **Opioid use** should be retained
  - If drugs are developed for acute pain that are improvement over opioids, opioid use would be important endpoint
  - Also noted that opioid use could be an important endpoint for trials of chronic pain interventions
- Discussion highlights difference in understanding – people administering trials view pain frequency, intensity, and duration as a concept and attempt to measure without fully understanding the experience of patients



## Other Physiological/Clinical Outcomes

|                                 | Overall<br>(N=44) | Patients/<br>Advocates<br>(N=10) | Clinicians/<br>Researchers<br>(N=10) | HTA/<br>Payers<br>(N=9) | Govt.<br>Agencies<br>(N=4) | Industry<br>(N=11) |
|---------------------------------|-------------------|----------------------------------|--------------------------------------|-------------------------|----------------------------|--------------------|
| Acute chest syndrome            | 91%               | 90%                              | 100%                                 | 89%                     | 50%                        | 100%               |
| Stroke/cerebrovascular accident | 89%               | 100%                             | 100%                                 | 67%                     | 50%                        | 100%               |
| Venous thromboembolism          | 71%               | 71%                              | 60%                                  | 78%                     | 75%                        | 73%                |
| Silent cerebral infarcts        | 56%               | 78%                              | 60%                                  | 22%                     | 50%                        | 64%                |
| Fatigue                         | 39%               | 70%                              | 30%                                  | 44%                     | 50%                        | 9%                 |

- **Venus thromboembolism** is an indirect outcome linked to heavy medication during acute crisis, therefore not important to include in core set
- **Stroke/CVA** would become important if there are interventions in the future
- Noted that heart failure not included (eliminated based on earlier voting) but considered important. Points to lack of basic SCD research to inform clinical trials.
- **Fatigue**
  - Important reflection of patient experience but difficult to measure
  - Related to **return to usual activities**, which is an important outcome for trials of acute interventions
  - Patients report notable increase in fatigue leading up to and during acute pain crisis
  - Noted lack of understanding about severity and impact of fatigue on people with SCD

## Biomarkers

|                     | Overall<br>(N=44) | Patients/<br>Advocates<br>(N=10) | Clinicians/<br>Researchers<br>(N=10) | HTA/<br>Payers<br>(N=9) | Govt.<br>Agencies<br>(N=4) | Industry<br>(N=11) |
|---------------------|-------------------|----------------------------------|--------------------------------------|-------------------------|----------------------------|--------------------|
| Level of hemoglobin | 89%               | 86%                              | 90%                                  | 100%                    | 100%                       | 78%                |
| Hemolysis           | 77%               | 86%                              | 67%                                  | 86%                     | 100%                       | 67%                |
| Oxygen % saturation | 85%               | 100%                             | 89%                                  | 57%                     | 100%                       | 89%                |
| Kidney function     | 76%               | 86%                              | 67%                                  | 86%                     | 50%                        | 78%                |
| Lung Function       | 74%               | 86%                              | 78%                                  | 71%                     | 50%                        | 67%                |

## Functioning Outcomes

|                                              | Overall<br>(N=44) | Patients/<br>Advocates<br>(N=10) | Clinicians/<br>Researchers<br>(N=10) | HTA/<br>Payers<br>(N=9) | Govt.<br>Agencies<br>(N=4) | Industry<br>(N=11) |
|----------------------------------------------|-------------------|----------------------------------|--------------------------------------|-------------------------|----------------------------|--------------------|
| <b>Ability to return to usual activities</b> | <b>86%</b>        | 90%                              | 90%                                  | 78%                     | 50%                        | 100%               |
| <b>Patient satisfaction with treatment</b>   | <b>73%</b>        | 70%                              | 90%                                  | 33%                     | 50%                        | 100%               |

## Resource Use

|                                   | Overall<br>(N=44) | Patients/<br>Advocates<br>(N=10) | Clinicians/<br>Researchers<br>(N=10) | HTA/<br>Payers<br>(N=9) | Govt.<br>Agencies<br>(N=4) | Industry<br>(N=11) |
|-----------------------------------|-------------------|----------------------------------|--------------------------------------|-------------------------|----------------------------|--------------------|
| <b>Emergency dept visit</b>       | <b>82%</b>        | 90%                              | 80%                                  | 78%                     | 75%                        | 82%                |
| <b>Freq of hospitalization</b>    | <b>82%</b>        | 80%                              | 90%                                  | 89%                     | 25%                        | 91%                |
| <b>Freq of ICU admission</b>      | <b>75%</b>        | 70%                              | 70%                                  | 78%                     | 75%                        | 82%                |
| <b>Length of hospital stay</b>    | <b>75%</b>        | 80%                              | 60%                                  | 67%                     | 50%                        | 100%               |
| <b>Hospital readmission</b>       | <b>73%</b>        | 90%                              | 40%                                  | 78%                     | 50%                        | 91%                |
| <b>Need for blood transfusion</b> | <b>70%</b>        | 50%                              | 80%                                  | 78%                     | 50%                        | 82%                |

- **Frequency of ICU admission**
  - Depends on setting (e.g. community-based hospital may elevate to ICU more readily than tertiary referral center)
- **Length of hospital stay**
  - Important when economics of novel therapies are examined by third parties
  - Should not be compared to a perceived average, but support looking at change for individual person
  - Most studies look at median length of stay to take into account “outliers”
- **Hospital readmission**
  - Important if looking at whether intervention makes it more or less likely for an acute episode to relapse or persist
- **Need for blood transfusion**
  - Not a useful outcome because the reasons are varied

## Mortality and Survival

|                                              | <b>Overall<br/>(N=44)</b> | <b>Patients/<br/>Advocates<br/>(N=10)</b> | <b>Clinicians/<br/>Researchers<br/>(N=10)</b> | <b>HTA/<br/>Payers<br/>(N=9)</b> | <b>Govt.<br/>Agencies<br/>(N=4)</b> | <b>Industry<br/>(N=11)</b> |
|----------------------------------------------|---------------------------|-------------------------------------------|-----------------------------------------------|----------------------------------|-------------------------------------|----------------------------|
| <b>Cause-specific<br/>survival/mortality</b> | <b>86%</b>                | 90%                                       | 100%                                          | 89%                              | 75%                                 | 73%                        |
