# Supplementary material for: coreSCD: multi-stakeholder consensus on core outcomes for sickle cell disease clinical trials
Source: Springer Nature journal article supplement (doi:10.1186/s12874-021-01413-8), 2021-10-19
Supplement: MOESM2 [file 19772538]

## coreSCD Candidate Outcomes

### Outcomes for Trials of Disease-Modifying Therapies (N=85)

| <b>Physiological/Clinical</b>            | <b>Functioning (cont.)</b>                    |
|------------------------------------------|-----------------------------------------------|
| Heart failure                            | Work and career performance                   |
| Retinopathy                              | School performance                            |
| Hearing loss                             | Health-related (global) quality of life       |
| Fatigue                                  | Patient satisfaction with treatment           |
| Sleep interference                       | Perceived burden of treatment                 |
| Underweight                              | <b>Resource Use</b>                           |
| Splenic sequestration                    | Frequency of hospitalization                  |
| Hepatic sequestration                    | Length of hospital stay                       |
| Avascular necrosis                       | Hospital readmission                          |
| Gout                                     | Frequency of ICU admission                    |
| Stroke or cerebrovascular accident (CVA) | Length of ICU stay                            |
| Silent cerebral infarcts                 | Emergency department (ED)                     |
| Transient ischemic attack (TIA)          | Acute / urgent care visit                     |
| Brain volume                             | Need for blood transfusion                    |
| Brain aneurysm                           | <b>Morality/Survival</b>                      |
| Peripheral neuropathy                    | All-cause survival / mortality                |
| Pain frequency                           | Cause-specific survival / mortality           |
| Pain intensity                           | Event-free survival                           |
| Pain-relieving medication use            | <b>Biomarkers/Biochemical Response</b>        |
| Pain duration                            | Level of hemoglobin (Hb)                      |
| Pain interference and pain impact        | Change in hematocrit (Hct)                    |
| Vaso-occlusive crisis (VOC)              | Change in mean corpuscular volume (MCV)       |
| Sickle cell neuropathy                   | Level of bilirubin                            |
| Need for dialysis                        | Level of lactate dehydrogenase (LDH)          |
| Priapism                                 | Reticulocyte count                            |
| Sexual function / dysfunction            | Hemolysis                                     |
| Sterility and infertility                | Level of sickle hemoglobin (HbS)              |
| Pregnancy complications                  | Level of fetal hemoglobin (HbF)               |
| Acute chest syndrome                     | Platelet count                                |
| Pulmonary hypertension                   | Level of C reactive protein (CRP)             |
| Leg ulceration                           | Change in the proportion of (DRBC)            |
| Venous thromboembolism                   | Level of erythropoietin (EPO)                 |
| <b>Functioning</b>                       | Oxygen percent saturation (SAO <sub>2</sub> ) |
| Functional exercise capacity             | RBC alloantibodies                            |
| Physical functioning                     | Soluble adhesion molecules                    |
| Cognitive function                       | Liver function                                |
| Difficulty concentrating                 | Splenic function                              |
| Processing speed                         | Kidney function                               |
| Educational performance                  | Lung function                                 |
| Anxiety                                  | Cardiac function                              |
| Depression                               | Brain natriuretic peptide                     |
| Concerns about future health             | Transcranial Doppler Velocities               |
| Romantic relationships                   | MRI cerebral blood flow                       |
| Missed days at school / work             | Oxygen extraction fraction                    |
| Families ability to work or make plans   |                                               |

## Outcomes for Trials of Acute Interventions (N=36)

| <b>Physiological/Clinical</b>            | <b>Resource Use</b>                           |
|------------------------------------------|-----------------------------------------------|
| Fatigue                                  | Frequency of hospitalization                  |
| Sleep interference                       | Length of hospital stay                       |
| Splenic sequestration                    | Hospital readmission                          |
| Hepatic sequestration                    | Frequency of ICU admission                    |
| Stroke or cerebrovascular accident (CVA) | Length of ICU stay                            |
| Silent cerebral infarcts                 | Emergency department (ED)                     |
| Transient ischemic attack (TIA)          | Acute / urgent care visit                     |
| Brain aneurysm                           | Need for blood transfusion                    |
| Pain frequency                           | <b>Biomarkers/Biochemical Response</b>        |
| Pain intensity                           | Level of hemoglobin (Hb)                      |
| Pain-relieving medication use            | Change in hematocrit (Hct)                    |
| Pain duration                            | Level of indirect bilirubin                   |
| Pain interference and pain impact        | Level of lactate dehydrogenase (LDH)          |
| Vaso-occlusive crisis (VOC)              | Reticulocyte count                            |
| Acute chest syndrome                     | Hemolysis                                     |
| Venous thromboembolism                   | Oxygen percent saturation (SAO <sub>2</sub> ) |
| <b>Functioning</b>                       | Soluble adhesion molecules                    |
| Patient satisfaction with treatment      | Kidney function                               |
| <b>Mortality/Survival</b>                | Lung function                                 |
| Cause-specific survival / mortality      |                                               |
