# Supplementary material for: coreSCD: multi-stakeholder consensus on core outcomes for sickle cell disease clinical trials
Source: Springer Nature journal article supplement (doi:10.1186/s12874-021-01413-8), 2021-10-19
Supplement: MOESM3 [file 19772538]

## Proposed Changes to List of Candidate Outcomes for Final Delphi Round\*

| DECISION                                                                                                                                                                      | OUTCOMES <i>(as included in Round 2 Delphi survey)</i> | RATIONALE                                                                                                                                                                                                                                        |                                                                                                                                                      |
|-------------------------------------------------------------------------------------------------------------------------------------------------------------------------------|--------------------------------------------------------|--------------------------------------------------------------------------------------------------------------------------------------------------------------------------------------------------------------------------------------------------|------------------------------------------------------------------------------------------------------------------------------------------------------|
| <b>Remove from consideration for core set</b><br><br><i>(although recommendations regarding any of these outcomes might still be part of the reporting from this project)</i> | Acute kidney injury                                    | Complication of treatment that would be considered as a safety measure                                                                                                                                                                           |                                                                                                                                                      |
|                                                                                                                                                                               | Pregnancy complications                                | Very important topic that needs further study, but not enough known at this point to include as a clinical trial outcome                                                                                                                         |                                                                                                                                                      |
|                                                                                                                                                                               | Venous thromboembolism                                 | Indirect outcome linked to heavy medication during acute pain crisis                                                                                                                                                                             |                                                                                                                                                      |
|                                                                                                                                                                               | Transcranial doppler velocities                        | Appropriate for pediatric but not adult trials                                                                                                                                                                                                   |                                                                                                                                                      |
|                                                                                                                                                                               | Level of hemoglobin                                    | There is substantial agreement that the relevance of each of these blood biomarkers is dependent on the mechanism of action of the specific intervention, and therefore not appropriate for a core set of outcomes relevant across interventions |                                                                                                                                                      |
|                                                                                                                                                                               | Level of fetal hemoglobin                              |                                                                                                                                                                                                                                                  |                                                                                                                                                      |
|                                                                                                                                                                               | Level of sickle hemoglobin                             |                                                                                                                                                                                                                                                  |                                                                                                                                                      |
|                                                                                                                                                                               | Hemolysis                                              |                                                                                                                                                                                                                                                  |                                                                                                                                                      |
| Change in hematocrit                                                                                                                                                          |                                                        |                                                                                                                                                                                                                                                  |                                                                                                                                                      |
| Oxygen % saturation                                                                                                                                                           |                                                        |                                                                                                                                                                                                                                                  |                                                                                                                                                      |
| <b>Move to different domain</b>                                                                                                                                               | Pain interference/impact                               | These were originally included under physiological/clinical outcomes, but there is agreement that both should be considered aspects of functioning with the recommendation that they be measured as part of HRQOL                                |                                                                                                                                                      |
|                                                                                                                                                                               | Fatigue                                                |                                                                                                                                                                                                                                                  |                                                                                                                                                      |
| <b>Combine</b>                                                                                                                                                                | Sickle cell nephropathy <u>and</u> kidney function     | A diagnosis of nephropathy occurs along the spectrum of kidney function and is based on the same types of measures                                                                                                                               |                                                                                                                                                      |
|                                                                                                                                                                               | Emergency department visit <u>and</u> acute care visit | Whether an individual with SCD goes to an emergency department or acute care center for a pain crisis is largely dependent on accessibility                                                                                                      |                                                                                                                                                      |
| <b>Rename/redefine</b>                                                                                                                                                        | VOC                                                    | <i>(replaced by the following outcomes)</i>                                                                                                                                                                                                      | Goal is to capture experience of acute severe pain directly related to sickle cell that may or may not result in an individual seeking medical care. |
|                                                                                                                                                                               | Pain frequency                                         | Frequency of acute sickle cell pain                                                                                                                                                                                                              |                                                                                                                                                      |
|                                                                                                                                                                               | Pain intensity                                         | Intensity of acute sickle cell pain                                                                                                                                                                                                              |                                                                                                                                                      |
|                                                                                                                                                                               | Pain duration                                          | Duration of acute sickle cell pain                                                                                                                                                                                                               |                                                                                                                                                      |

\*As discussed at in-person consensus meeting and subsequently endorsed by Delphi Panel
