# Supplementary material for: coreSCD: multi-stakeholder consensus on core outcomes for sickle cell disease clinical trials
Source: Springer Nature journal article supplement (doi:10.1186/s12874-021-01413-8), 2021-10-19
Supplement: MOESM4 [file 19772538]

## coreSCD Outcomes with Definitions

| OUTCOME                                         | DEFINITION                                                                                                                                                                                                                                                                                 |
|-------------------------------------------------|--------------------------------------------------------------------------------------------------------------------------------------------------------------------------------------------------------------------------------------------------------------------------------------------|
| <b>Acute sickle cell pain- frequency</b>        | How often the pain is experienced in a given time period. Acute sickle cell pain is pain directly related to sickle cell disease that is usually associated with vaso-occlusive crisis and may or may not result in an individual seeking medical care.                                    |
| <b>Stroke or cerebrovascular accident (CVA)</b> | A traumatic complication of sickle cell disease, including ischemic and hemorrhagic stroke that is associated with intimal disease of the large cerebral arteries.                                                                                                                         |
| <b>Acute chest syndrome (ACS)</b>               | A vaso-occlusive crisis of the pulmonary vasculature commonly seen in people with sickle cell anemia. This may include ACS incidence, ACS severity, ACS relapse rate, ACS duration.                                                                                                        |
| <b>Neurocognitive function</b>                  | Cognitive functions associated with specific pathways or loci within the brain that are affected by different disease processes. Neurocognitive functions can be assessed by standard tests such as the Mini-Mental State Examination (MMSE) and the Montreal Cognitive Assessment (MoCA). |
| <b>Health-related quality of life (HRQOL)</b>   | Patient's perception of the effect of their illness and its treatment on general well-being. HRQOL assessment for SCD should include measures of physical, social, and emotional functioning. Pain interference and fatigue should also be measured as part of HRQOL in SCD.               |
| <b>Ability to return to usual activities</b>    | Ability to carry out various activities such as going to work, doing housework, attending school, driving, shopping, etc.                                                                                                                                                                  |
| <b>Frequency of hospitalization</b>             | The number of admissions for a patient in a facility over a specified time period.                                                                                                                                                                                                         |
| <b>ED/acute care visit</b>                      | The number of visits to the emergency department and/or SCD acute care center, where patients can receive timely treatment for urgent or extreme medical conditions.                                                                                                                       |
| <b>Need for blood transfusion</b>               | This may include the number of transfusions, total units of transfusion, number of patients receiving transfusion.                                                                                                                                                                         |
| <b>Cause-specific survival/mortality</b>        | Impacts on survival/mortality caused by specific factors.                                                                                                                                                                                                                                  |
| <b>Event-free survival</b>                      | The length of time after primary treatment for SCD ends that an individual remains alive and free of SCD symptoms.                                                                                                                                                                         |
